# Supplementary material
Source: publisher site journal article supplement (https://www.dovepress.com/article/556764)
Supplement: Supplementary file 1 [file 556764%20Supplementary%20Corrected_JAK_1.docx]

# Supplementary Tables

**Supplementary Table 1:** Retrieved information from medical records

| **Clinical data obtained from medical records during validation** |
| --- |
| Patient ID: Personal identification number (CPR). |
| Lipid profile closest to the DNPR diagnosis date. |
| Historic LDL-C exceeding criteria for FH suspicion. |
| Lipid lowering treatment at diagnosis date. |
| Lipid lowering treatment at 6±2 months follow-up. |
| Lipid profile at 6±2 months follow-up. |
| History of dietitian counseling. |
| Measured Lp(a). |
| Cardiovascular risk factors at date of FH diagnosis. |
| **DLCN components obtained from medical records during validation** |
| Highest measured LDL-C. |
| Familial history and cardiovascular disposition. |
| Clinical cardiovascular history.  Objective examination. Presence of tendon xanthomas, corneal arcus. |
| Genetic results: Pathogenic variants in the LDLR, ApoB and PCSK9 genes. |

**Abbreviations:** ApoB, Apolipoprotein B; CPR, Central Person Registry; DLCN, Dutch Lipid Clinical Network score; DNPR, Danish National Patients Registry; FH, Familial Hypercholesterolemia; LDL-C, Low-density lipoprotein cholesterol; LDLR, Low-density lipoprotein receptor; Lp(a), Lipoprotein(a); PCSK9, Proprotein-convertase-subtilisin/kexin-type 9.

**Supplementary Table 2:** Correction factors to estimate LDL-C values corrected for use of lipid lowering treatment

|  | **Daily dose (mg/d)** | | | | | | | | **mg/14 d** |
| --- | --- | --- | --- | --- | --- | --- | --- | --- | --- |
| **Lipid lowering treatment** | 0 | 5 | 10 | 20 | 30 | 40 | 60 | 80 | 140 |
| Ezetimibe | - | - | 1.2 | - | - | - | - | - | - |
| Atorvastatin | - | - | 1.6 | 1.8 | - | 2.0 | 1.8 | 2.2 | - |
| Atorvastatin + Ezetimibe | - | - | 2.0 | 2.2 | - | 2.2 | - | 2.5 | - |
| Rosuvastatin | - | 1.6 | 1.8 | 1.9 | 1.8 | 2.1 | - | - | - |
| Rosuvastatin + Ezetimibe | - | - | 2.5 | 2.7 | - | 3.3 | - | - | - |
| Simvastatin | - | 1.3 | 1.4 | 1.5 | - | 1.6 | - | 1.7 | - |
| Simvastatin + Ezetimibe | - | - | 1.9 | 2.0 | - | 2.3 | - | - | - |
| Pravastatin | - | - | 1.3 | 1.4 | - | 1.6 | - | - | - |
| Pravastatin + Ezetimibe | - | - | 1.5 | 1.6 | - | 1.7 | - | - | - |
| PCSK9 inhibitor monotherapy | - | - | - | - | - | - | - | - | 2.5 |
| PCSK9 inhibitor + Ezetimibe | - | - | 4.8 | - | - | - | - | - | - |
| PCSK9 inhibitor + Ezetimibe + Atorvastatin | - | - | - | - | - | - | - | 6.7 | - |

**Notes:** The correction factors were calculated as 100/(100-LDL-C reduction in percentages at a given dose) as in the study by Hedegaard et al. 2023. 1 The correction factors were based on Besseling et al and Visseren et al. 2,3

**Example:** A LDL-C of 2.5 mmol/L measured on atorvastatin 80 mg daily corresponds to an estimated LDL-C of 5.5 mmol/L (2,5 mmol/L multiplied by correction factor 2.2).

**Abbreviations:** LDL-C, Low-density lipoprotein cholesterol; PCSK9, Proprotein-convertase-subtilisin/kexin-type 9.

**Supplementary Table 3:** Validity of DLCN components in the DFH

| **DLCN components** | Verified in the DFH  (n) | Registered in the DFH  (n) | Total verified according to medical record for subset in the DFH  (n) | Data Validity a  PPV (%)  (95%CI) | Data Completeness  b  Sensitivity (%)  (95%CI) |
| --- | --- | --- | --- | --- | --- |
| **Family history** | | | | | |
| First-degree relative with known premature (<55 years, men; <60 years, women) coronary heart disease  **OR**  First-degree relative with known LDL-C >95th percentile by age and sex | 195 | 239 | 350 | 81.6 (76.2; 86.0) | 55.71 (50.5;60.8) |
| First-degree relative with tendon xanthoma and/or corneal arcus  **OR**  Child(ren) <18 years with LDL-C >95th percentile by age and sex | 3 | 36 | 27 | 8.3 (2.9; 21.8) | 11.1 (3.8; 28.1) |
| **Clinical history** | | | | | |
| Subject has premature (<55 years, men; <60 years, women) cerebral or peripheral vascular disease | 1 | 6 | 10 | 16.7 (3.0; 56.3) | 10.0 (1.8; 40.4) |
| Subject has premature (<55 years, men; <60 years, women) coronary heart disease | 51 | 59 | 60 | 86.4 (75.5; 93.0) | 85.0 (74.0; 91.9) |
| **Physical examination** | | | | | |
| Subject has corneal arcus <45 years | 2 | 3 | 7 | 66.7 (20.8; 93.8) | 28.6 (8.2; 64.1) |
| Subject has tendon xanthomas | 14 | 18 | 22 | 77.8 (54.8; 91.0) | 63.6 (42.9; 80.3) |
| **Highest LDL-C measured** | | | | | |
| LDL-C < 4.0 mmol/L | 13 | 16 | 33 | 81.2 (57.0; 93.4) | 39.4 (24.7; 56.3) |
| LDL-C 4.0–4.9 mmol/L | 30 | 42 | 58 | 71.4 (56.4; 82.8) | 51.7 (39.2; 64.1) |
| LDL-C 5.0–6.4 mmol/L | 139 | 165 | 208 | 84.2 (77.9; 89.0) | 66.8 (60.2; 72.9) |
| LDL-C 6.5–8.4 mmol/L | 86 | 104 | 138 | 82.7 (74.3; 88.8) | 62.3 (54.0; 70.0) |
| LDL-C ≥ 8.5 mmol/L | 22 | 28 | 36 | 78.6 (60.5; 89.8) | 61.1 (44.9; 75.2) |
| **Genetics** | | | | | |
| Likely pathogenic/ pathogenic variants in LDLR-, ApoB- or PCSK9 genes | 157 | 165 | 277 | 95.1 (90.7; 97.5) | 56.7 (50.8; 63.4) |

**Notes:** a Data Validity: Proportion of valid DLCN components in the DFH of all DLCN components registered in the DFH. b Data completeness: Proportion of valid DLCN components in the DFH of all verified DLCN components in the medical record among the subset registered in the DFH.

**Abbreviations:** ApoB, Apolipoprotein B; CI, Confidence Interval; DFH, Danish Familial Hypercholesterolemia Registry; DLCN, Dutch Lipid Clinical Network score; LDL-C, Low density lipoprotein cholesterol; LDLR, Low density lipoprotein receptor; n, Number; PCSK9, Proprotein-convertase-subtilisin/kexin-type 9; PPV, Positive Predictive Value.

**Supplementary Table 4:** Quality Indicators in the DFH

|  | **DNPR** | | **Subset also in the DFH** | |
| --- | --- | --- | --- | --- |
| **All** | **Verified FH** | **Registered DLCN≥6** | **Verified**  **DLCN ≥6** |
| **N (total)** | 800 | 510 | 383 | 318 |
| Proportion genetically tested of total, % (n) | 80.0 (640) | 95.3 (486) | 93.5 (358) | 98.1 (312) |
| Proportion where Lp(a) has been measured, % (n) | 73.3 (586) | 81.0 (413) | 88.5 (339) | 84.9 (270) |
| Proportion of patients referred to dietitian, % (n) | 39.3 (314) | 42.9 (219) | 33.4 (128) | 46.5 (148) |
| Proportion received dietician council 6 months after diagnosis, % (n) | 28.0 (224) | 30.2 (154) | 29.8 (114) | 31.8 (101) |
| **Proportion at 6 months follow-up after diagnosis,** % (n) | 77.3 (618) | 81.2 (414) | 79.9 (306) | 81.1 (258) |
| Proportion receiving LLT “at 6 months FU” % (n) | 90.6 (560) | 93.5 (387) | 95.1 (291) | 94.6 (244) |
| Proportion achieving LDL-C therapy goals within 6-months % (n) | 17.3 (107) | 14.2 (59) | 15.4 (47) | 14.7 (38) |

**Notes:** Proportion of subjects fulfilling specific quality indicators in the DFH. The three bottom lines illustrates the proportion of patients with lipid levels available at 6 months FU, proportion of those receiving LLT and achieving LDL-C goals according to Danish guidelines.

**Abbreviations:** CI, Confidence Interval; DFH, Danish Familial Hypercholesterolemia Registry;DLCN, Dutch Lipid Clinical Network score; DNPR, Danish National Patient Registry; FH, Familial Hypercholesterolemia; LLT, Lipid lowering treatment; LDL-C, Low density lipoprotein cholesterol; Lp(a), Lipoprotein(a); n, Number; PPV, Positive Predictive Value.

**Supplementary References**

1. Hedegaard BS, Bork CS, Kanstrup HL, et al. Genetic testing increases the likelihood of a diagnosis of familial hypercholesterolaemia among people referred to lipid clinics: Danish national study. *Atherosclerosis*. May 2023;373:10-16. doi:10.1016/j.atherosclerosis.2023.04.003

2. Besseling J, Kindt I, Hof M, Kastelein JJ, Hutten BA, Hovingh GK. Severe heterozygous familial hypercholesterolemia and risk for cardiovascular disease: a study of a cohort of 14,000 mutation carriers. *Atherosclerosis*. Mar 2014;233(1):219-23. doi:10.1016/j.atherosclerosis.2013.12.020

3. Visseren F, Mach F, Smulders YM, et al. 2021 ESC Guidelines on cardiovascular disease prevention in clinical practice. *Eur Hear J*. 2021: 42(34): 3227-3337. doi:10.1093/eurheartj/ehab484
